# Supplementary material for: Systematic design of secondary building units by an efficient cation-directing strategy under regular vibrations of ionic liquids
Source: Royal Society of Chemistry journal article supplement (doi:10.1039/c5dt01595b), 2015-01-01
Supplement: c5dt01595b1.pdf [file c5dt01595b1.pdf]

<sup>1</sup><Supporting Information>

**Systematic Design of Secondary Building Units by an  
Efficient Cation-Directing Strategy under Regular Vibrations  
of Ionic Liquids**

**Bing An,<sup>a,†</sup> Jun-Li Wang,<sup>a,†</sup> Yan Bai<sup>\*a, b</sup> and Dong-Bin Dang<sup>\*a</sup>**

<sup>a</sup>Henan Key Laboratory of Polyoxometalate Chemistry. Institute of Molecular and Crystal Engineering, College of Chemistry and Chemical Engineering, Henan University, Kaifeng 475004, P.R. China.

<sup>b</sup>State Key Laboratory of Coordination Chemistry, Nanjing University, Nanjing 210093, P.R. China.

**Contents:**

Section 1 Supplementary Structural Tables.

Section 2 Supplementary Structural Figures.

Section 3 Additional Measurements.

Section 4 Additional magnetic properties.

---

<sup>†</sup> These authors contributed equally.

## 1. Supplementary Structural Tables.

**Table S1** Crystal data for polymers **1-4**

|                                                                             | <b>1</b>                                                          | <b>2</b>                                                                       | <b>3</b>                                                                       | <b>4</b>                                                                                           |
|-----------------------------------------------------------------------------|-------------------------------------------------------------------|--------------------------------------------------------------------------------|--------------------------------------------------------------------------------|----------------------------------------------------------------------------------------------------|
| Formula                                                                     | C <sub>18</sub> H <sub>17</sub> BrCoN <sub>2</sub> O <sub>4</sub> | C <sub>86</sub> H <sub>66</sub> Co <sub>7</sub> N <sub>4</sub> O <sub>28</sub> | C <sub>88</sub> H <sub>68</sub> Co <sub>6</sub> N <sub>4</sub> O <sub>26</sub> | C <sub>132</sub> H <sub>116</sub> BrCo <sub>4</sub> N <sub>8</sub> Na <sub>5</sub> O <sub>32</sub> |
| M <sub>r</sub> (g mol <sup>-1</sup> )                                       | 464.18                                                            | 2015.94                                                                        | 1951.04                                                                        | 2756.91                                                                                            |
| T (K)                                                                       | 296(2)                                                            | 296(2)                                                                         | 296(2)                                                                         | 296(2)                                                                                             |
| Space group                                                                 | <i>P2<sub>1</sub>/n</i>                                           | <i>Pbca</i>                                                                    | <i>C2/c</i>                                                                    | <i>P4/n</i>                                                                                        |
| Crystal system                                                              | Monoclinic                                                        | Orthorhombic                                                                   | Monoclinic                                                                     | Tetragonal                                                                                         |
| <i>a</i> (Å)                                                                | 10.3019(16)                                                       | 19.719(2)                                                                      | 20.270(4)                                                                      | 24.6698(15)                                                                                        |
| <i>b</i> (Å)                                                                | 15.482(3)                                                         | 15.6642(17)                                                                    | 16.336(3)                                                                      |                                                                                                    |
| <i>c</i> (Å)                                                                | 10.9190(16)                                                       | 27.118(3)                                                                      | 24.664(5)                                                                      | 9.9668(12)                                                                                         |
| $\beta$ (deg)                                                               | 92.482(3)                                                         |                                                                                | 101.671(4)                                                                     |                                                                                                    |
| <i>V</i> (Å <sup>3</sup> )                                                  | 1739.9(5)                                                         | 8376.1(16)                                                                     | 7998(3)                                                                        | 6065.8(9)                                                                                          |
| <i>Z</i>                                                                    | 4                                                                 | 4                                                                              | 4                                                                              | 2                                                                                                  |
| <i>D<sub>c</sub></i> (g cm <sup>-3</sup> )                                  | 1.772                                                             | 1.599                                                                          | 1.620                                                                          | 1.509                                                                                              |
| $\mu$ (mm <sup>-1</sup> )                                                   | 3.310                                                             | 1.437                                                                          | 1.302                                                                          | 0.970                                                                                              |
| Limiting indices                                                            | -12 ≤ <i>h</i> ≤ 11                                               | -23 ≤ <i>h</i> ≤ 23                                                            | -21 ≤ <i>h</i> ≤ 24                                                            | -23 ≤ <i>h</i> ≤ 29                                                                                |
|                                                                             | -17 ≤ <i>k</i> ≤ 18                                               | -16 ≤ <i>k</i> ≤ 18                                                            | -19 ≤ <i>k</i> ≤ 12                                                            | -29 ≤ <i>k</i> ≤ 27                                                                                |
|                                                                             | -12 ≤ <i>l</i> ≤ 8                                                | -29 ≤ <i>l</i> ≤ 32                                                            | -27 ≤ <i>l</i> ≤ 29                                                            | -9 ≤ <i>l</i> ≤ 11                                                                                 |
| GOF on <i>F</i> <sup>2</sup>                                                | 1.020                                                             | 1.072                                                                          | 1.027                                                                          | 1.058                                                                                              |
| <i>R</i> <sub>1</sub> , <i>wR</i> <sub>2</sub> [ <i>I</i> > 2σ( <i>I</i> )] | 0.0317, 0.0807                                                    | 0.0460, 0.1191                                                                 | 0.0530, 0.1243                                                                 | 0.0459, 0.1175                                                                                     |
| <i>R</i> <sub>1</sub> , <i>wR</i> <sub>2</sub> [all data]                   | 0.0430, 0.0842                                                    | 0.0686, 0.1280                                                                 | 0.0737, 0.1333                                                                 | 0.0681, 0.1258                                                                                     |

**Table S2.** Selected bond lengths (Å) and bond angles (°) for polymer **1**.

| bond              | length     | bond              | length     |
|-------------------|------------|-------------------|------------|
| Co(1)–O(1A)       | 2.040(2)   | Co(1)–O(2B)       | 2.051(2)   |
| Co(1)–O(4C)       | 2.058(2)   | Co(1)–O(3)        | 2.063(2)   |
| Co(1)–Br(1)       | 2.4622(6)  |                   |            |
| bond angle        | degree     | bond angle        | degree     |
| O(1A)–Co(1)–O(2B) | 156.89(10) | O(1A)–Co(1)–O(4C) | 88.99(11)  |
| O(2B)–Co(1)–O(4C) | 88.30(11)  | O(1A)–Co(1)–O(3)  | 86.82(11)  |
| O(2B)–Co(1)–O(3)  | 86.78(11)  | O(4C)–Co(1)–O(3)  | 157.05(10) |
| O(1A)–Co(1)–Br(1) | 101.55(7)  | O(2B)–Co(1)–Br(1) | 101.47(8)  |
| O(4C)–Co(1)–Br(1) | 101.89(8)  | O(3)–Co(1)–Br(1)  | 101.06(8)  |

Symmetry codes A:  $1/2 + x, 1/2 - y, -1/2 + z$ ; B:  $3/2 - x, y - 1/2, 3/2 - z$ ; C:  $2 - x, -y, 1 - z$

**Table S3.** Hydrogen bond parameters (Å, °) of polymer **1**.

| D-H...A                | d(D-H) | d(H...A) | d(D...A)  | ∠(DHA) | Symmetry transformation for A |
|------------------------|--------|----------|-----------|--------|-------------------------------|
| C(13)-H(13A)...Br(1)   | 0.96   | 2.80     | 3.727(9)  | 164    | $5/2 - x, -1/2 + y, 1/2 - z$  |
| C(13)-H(13C)...O(4)    | 0.96   | 2.49     | 3.358(9)  | 150    | $3 - x, -y, 1 - z$            |
| C(13')-H(13D)... Br(1) | 0.96   | 2.92     | 3.819(10) | 156    | $2 - x, -y, 1 - z$            |
| C(13')-H(13E)...O(2)   | 0.96   | 2.56     | 3.310(10) | 135    | $5/2 - x, -1/2+y, 3/2 - z$    |

**Table S4.** Selected bond lengths (Å) and bond angles (°) for polymer **2**.

| bond               | length     | bond               | length     |
|--------------------|------------|--------------------|------------|
| Co(1)–O(13)        | 1.9317(18) | Co(1)–O(10B)       | 1.942(2)   |
| Co(1)–O(2)         | 1.945(2)   | Co(1)–O(7A)        | 1.976(2)   |
| Co(2)–O(14)        | 2.0654(18) | Co(2)–O(11)        | 2.069(2) 3 |
| Co(2)–O(8A)        | 2.077(2)   | Co(2)–O(6B)        | 2.089(2)   |
| Co(2)–O(1)         | 2.143(2)   | Co(2)–O(13)        | 2.1453(19) |
| Co(3)–O(14)        | 2.0633(18) | Co(3)–O(5)         | 2.0747(19) |
| Co(3)–O(13)        | 2.0811(18) | Co(4)–O(14)        | 1.9555(19) |
| Co(4)–O(3)         | 1.959(3) 8 | Co(4)–O(12)        | 1.975(2) 3 |
| Co(4)–O(9)         | 1.979(2)   |                    |            |
| bond angle         | degree     | bond angle         | degree     |
| O(13)–Co(1)–O(10B) | 131.08(9)  | O(13)–Co(1)–O(2)   | 113.16(9)  |
| O(10B)–Co(1)–O(2)  | 99.22(10)  | O(13)–Co(1)–O(7A)  | 99.48(9)   |
| O(10B)–Co(1)–O(7A) | 106.34(10) | O(2)–Co(1)–O(7A)   | 105.27(10) |
| O(14)–Co(2)–O(11C) | 94.77(8)   | O(14)–Co(2)–O(8A)  | 172.36(8)  |
| O(11C)–Co(2)–O(8A) | 92.15(8)   | O(14)–Co(2)–O(6B)  | 92.62(8)   |
| O(11C)–Co(2)–O(6B) | 91.19(8)   | O(8A)–Co(2)–O(6B)  | 90.47(8)   |
| O(14)–Co(2)–O(1)   | 84.42(8)   | O(11C)–Co(2)–O(1)  | 84.09(8)   |
| O(8A)–Co(2)–O(1)   | 93.10(8)   | O(6B)–Co(2)–O(1)   | 174.19(8)  |
| O(14)–Co(2)–O(13)  | 83.40(7)   | O(11C)–Co(2)–O(13) | 178.13(8)  |
| O(8A)–Co(2)–O(13)  | 89.70(8)   | O(6B)–Co(2)–O(13)  | 88.53(7)   |
| O(1)–Co(2)–O(13)   | 96.07(8)   | O(14)–Co(3)–O(5B)  | 92.64(8)   |
| O(14)–Co(3)–O(5)   | 87.36(8)   | O(14)–Co(3)–O(13)  | 85.06(7)   |
| O(14B)–Co(3)–O(13) | 94.94(7)   | O(5B)–Co(3)–O(13)  | 87.45(7)   |
| O(5)–Co(3)–O(13)   | 92.55(7)   | O(14)–Co(4)–O(3D)  | 110.11(12) |
| O(14)–Co(4)–O(12C) | 106.09(9)  | O(3D)–Co(4)–O(12C) | 120.18(13) |
| O(14)–Co(4)–O(9)   | 119.49(9)  | O(3D)–Co(4)–O(9)   | 93.77(12)  |
| O(12C)–Co(4)–O(9)  | 107.70(10) |                    |            |

Symmetry codes : A:  $1/2 + x, 1/2 - y, -1/2 + z$ ; B:  $1/2 - x, -y, 3/2 + z$ ; C:  $-x, 1/2 + y, 1/2 - z$ ; D  $-1/2 - x, -1/2 + y, z$ ;

**Table S5.** Hydrogen bond parameters (Å, °) of polymer **2**.

| D–H...A              | d(D–H) | d(H...A) | d(D...A) | ∠(DHA) | Symmetry transformation for A |
|----------------------|--------|----------|----------|--------|-------------------------------|
| C(5)–H(5A)...O(3)    | 0.93   | 2.41     | 2.731(5) | 100    |                               |
| C(8)–H(8A)...O(4)    | 0.93   | 2.38     | 3.009(9) | 125    |                               |
| C(16)–H(16A)...O(2)  | 0.93   | 2.55     | 3.416(4) | 154    |                               |
| C(23)–H(23A)...O(6)  | 0.93   | 2.34     | 2.953(4) | 123    |                               |
| C(28)–H(28A)...O(10) | 0.93   | 2.38     | 2.713(4) | 101    |                               |
| C(32)–H(32A)...O(1)  | 0.93   | 2.60     | 3.412(4) | 147    | $-x, -1/2 + y, 1/2 - z$       |
| C(35)–H(35A)...O(9)  | 0.93   | 2.26     | 2.857(5) | 121    |                               |
| C(37)–H(37A)...O(8)  | 0.93   | 2.27     | 3.181(6) | 167    | $-1/2 - x, -y, -1/2 + z$      |

**Table S6.** Selected bond lengths (Å) and bond angles (°) for polymer **3**.

| bond               | length     | bond               | length     |
|--------------------|------------|--------------------|------------|
| Co(1)–O(2A)        | 2.045(4)   | Co(1)–O(5)         | 2.047(4)   |
| Co(1)–O(1)         | 2.075(3)   | Co(1)–O(10)        | 2.129(4)   |
| Co(1)–O(11)        | 2.149(4)   | Co(1)–O(6B)        | 2.208(4)   |
| Co(2)–O(4)         | 2.025(4)   | Co(2)–O(12C)       | 2.031(4)   |
| Co(2)–O(3A)        | 2.038(4)   | Co(2)–O(1)         | 2.056(3)   |
| Co(2)–O(8)         | 2.137(3)   | Co(2)–O(9)         | 2.350(4)   |
| Co(3)–O(7B)        | 1.958(4)   | Co(3)–O(13C)       | 1.966(4)   |
| Co(3)–O(8D)        | 1.984(3)   | Co(3)–O(1)         | 1.986(3)   |
| bond angle         | degree     | bond angle         | degree     |
| O(2A)–Co(1)–O(5)   | 94.71(18)  | O(2A)–Co(1)–O(1)   | 99.84(14)  |
| O(5)–Co(1)–O(1)    | 96.36(15)  | O(2A)–Co(1)–O(10)  | 167.20(17) |
| O(5)–Co(1)–O(10)   | 89.36(18)  | O(1)–Co(1)–O(10)   | 91.74(14)  |
| O(2A)–Co(1)–O(11)  | 106.93(16) | O(5)–Co(1)–O(11)   | 86.84(16)  |
| O(1)–Co(1)–O(11)   | 152.70(15) | O(10)–Co(1)–O(11)  | 61.11(16)  |
| O(2A)–Co(1)–O(6B)  | 84.64(16)  | O(5)–Co(1)–O(6B)   | 175.61(16) |
| O(1)–Co(1)–O(6B)   | 88.03(14)  | O(10)–Co(1)–O(6B)  | 90.37(17)  |
| O(11)–Co(1)–O(6B)  | 89.20(17)  | O(4)–Co(2)–O(12C)  | 162.13(18) |
| O(4)–Co(2)–O(3A)   | 92.2(2)    | O(12C)–Co(2)–O(3A) | 85.8(2)    |
| O(4)–Co(2)–O(1)    | 100.13(15) | O(12C)–Co(2)–O(1)  | 97.74(15)  |
| O(3A)–Co(2)–O(1)   | 95.13(16)  | O(4)–Co(2)–O(8)    | 86.66(15)  |
| O(12C)–Co(2)–O(8)  | 91.74(18)  | O(3A)–Co(2)–O(8)   | 168.41(16) |
| O(1)–Co(2)–O(8)    | 96.42(12)  | O(4)–Co(2)–O(9)    | 82.18(15)  |
| O(12C)–Co(2)–O(9)  | 81.93(16)  | O(3A)–Co(2)–O(9)   | 110.72(16) |
| O(1)–Co(2)–O(9)    | 154.00(13) | O(8)–Co(2)–O(9)    | 57.70(12)  |
| O(7B)–Co(3)–O(13C) | 103.56(18) | O(7B)–Co(3)–O(8D)  | 123.05(15) |
| O(13C)–Co(3)–O(8D) | 101.15(15) | O(7B)–Co(3)–O(1)   | 120.05(15) |
| O(13C)–Co(3)–O(1)  | 109.66(15) | O(8D)–Co(3)–O(1)   | 97.72(13)  |
| Co(3)–O(1)–Co(2)   | 112.38(14) | Co(3)–O(1)–Co(1)   | 106.19(14) |
| Co(2)–O(1)–Co(1)   | 108.93(14) |                    |            |

Symmetry codes: A:  $1/2 - x, 1/2 + y, 1/2 - z$ ; B:  $-1/2 + x, 1/2 + y, z$ ; C:  $1/2 + x, 1/2 + y, z$ ; D:  $1/2 - x, 3/2 - y, -z$

**Table S7.** Hydrogen bond parameters (Å, °) of polymer **3**.

| D–H...A              | D(D–H) | d(H...A) | d(D...A)  | ∠(DHA) | Symmetry transformation for A |
|----------------------|--------|----------|-----------|--------|-------------------------------|
| O(1)–H(1A)...O(13)   | 0.85   | 2.54     | 3.337(4)  | 157    | $-x, 1 - y, -z$               |
| C(8)–H(8A)...O(5)    | 0.93   | 2.50     | 3.034(13) | 117    | $5/2 - x, -1/2 + y, 1/2 - z$  |
| C(11)–H(11B)...O(3)  | 1.26   | 2.21     | 3.171(18) | 130    |                               |
| C(16)–H(16A)...O(7)  | 0.93   | 2.37     | 2.71(3)   | 101    |                               |
| C(16)–H(16B)...O(7)  | 0.96   | 2.36     | 2.71(3)   | 101    |                               |
| C(20)–H(20A)...O(4)  | 0.93   | 2.52     | 3.45(2)   | 173    |                               |
| C(20)–H(20B)...O(8)  | 0.99   | 2.51     | 3.15(2)   | 122    |                               |
| C(23)–H(23A)...O(6)  | 0.93   | 2.19     | 2.83(3)   | 125    |                               |
| C(23)–H(23A)...O(11) | 0.93   | 2.35     | 3.19(3)   | 150    | $1/2 + x, -1/2 + y, z$        |
| C(23)–H(23B)...O(6)  | 1.05   | 2.17     | 2.83(3)   | 119    |                               |
| C(23)–H(23B)...O(11) | 1.05   | 2.57     | 3.19(3)   | 118    | $1/2 + x, -1/2 + y, z$        |
| C(29)–H(29A)...O(12) | 0.93   | 2.26     | 2.621(14) | 102    |                               |
| C(32)–H(32A)...O(13) | 0.93   | 2.20     | 2.854(17) | 126    |                               |



**Table S8.** Selected bond lengths (Å) and bond angles (°) for polymer **4**.

| bond              | length     | bond              | length     |
|-------------------|------------|-------------------|------------|
| Co(1)–O(3B)       | 1.936(2)   | Co(1)–O(7)        | 1.981(3)   |
| Co(1)–O(5C)       | 1.996(3)   | Co(1)–O(2A)       | 2.006(2)   |
| Co(1)–Na(1)       | 3.3854(15) | Na(1)–O(8)        | 2.285(3)   |
| Na(1)–O(1)        | 2.313(3)   | Na(1)–O(4B)       | 2.496(3)   |
| Na(1)–O(4D)       | 2.546(3)   | Na(1)–O(2A)       | 2.572(3)   |
| Na(1)–Br(1)       | 2.9695(14) | Na(1)–Na(2D)      | 3.305(2)   |
| Na(1)–Na(1E)      | 3.8436(19) | Na(2)–O(4)        | 2.330(2)   |
| Na(2)–Br(1F)      | 3.077(3)   | Na(2)–Na(1F)      | 3.305(2)   |
| bond angle        | degree     | bond angle        | degree     |
| O(3B)–Co(1)–O(7)  | 112.94(13) | O(3B)–Co(1)–O(5C) | 126.90(14) |
| O(7)–Co(1)–O(5C)  | 98.68(14)  | O(3B)–Co(1)–O(2A) | 114.15(11) |
| O(7)–Co(1)–O(2A)  | 102.39(12) | O(5C)–Co(1)–O(2A) | 98.14(13)  |
| O(8)–Na(1)–O(1)   | 93.25(11)  | O(8)–Na(1)–O(4B)  | 90.84(10)  |
| O(1)–Na(1)–O(4B)  | 172.19(11) | O(8)–Na(1)–O(4D)  | 100.26(11) |
| O(1)–Na(1)–O(4D)  | 91.91(10)  | O(4B)–Na(1)–O(4D) | 80.81(11)  |
| O(8)–Na(1)–O(2A)  | 86.74(11)  | O(1)–Na(1)–O(2A)  | 99.04(10)  |
| O(4B)–Na(1)–O(2A) | 87.82(9)   | O(4D)–Na(1)–O(2A) | 166.69(10) |
| O(8)–Na(1)–Br(1)  | 172.61(9)  | O(1)–Na(1)–Br(1)  | 93.86(8)   |
| O(4B)–Na(1)–Br(1) | 82.34(7)   | O(4D)–Na(1)–Br(1) | 81.53(7)   |
| O(2A)–Na(1)–Br(1) | 90.15(7)   |                   |            |

Symmetry codes: A:  $y, 3/2 - x, z$ ; B:  $y, 3/2 - x, -1 + z$ ; C:  $1 - y, 1/2 + x, -z$ ; D:  $x, y, -1 + z; -1/2 + z$ ; E:  $3/2 - y, x, z$ ; F:  $x, y, 1 + z$

**Table S9.** Hydrogen bond parameters (Å, °) of polymer **4**.

| D-H...A             | d(D-H) | d(H...A) | d(D...A) | ∠(DHA) |
|---------------------|--------|----------|----------|--------|
| C(8)-H(8A)...O(3)   | 0.93   | 2.37     | 2.865(4) | 113    |
| C(11)-H(11A)...O(1) | 0.93   | 2.49     | 3.032(5) | 117    |
| C(17)-H(17A)...O(1) | 0.93   | 2.58     | 3.366(5) | 143    |
| C(20)-H(20A)...O(7) | 0.93   | 2.36     | 2.903(5) | 117    |

## 2. Supplementary Structural Figures.

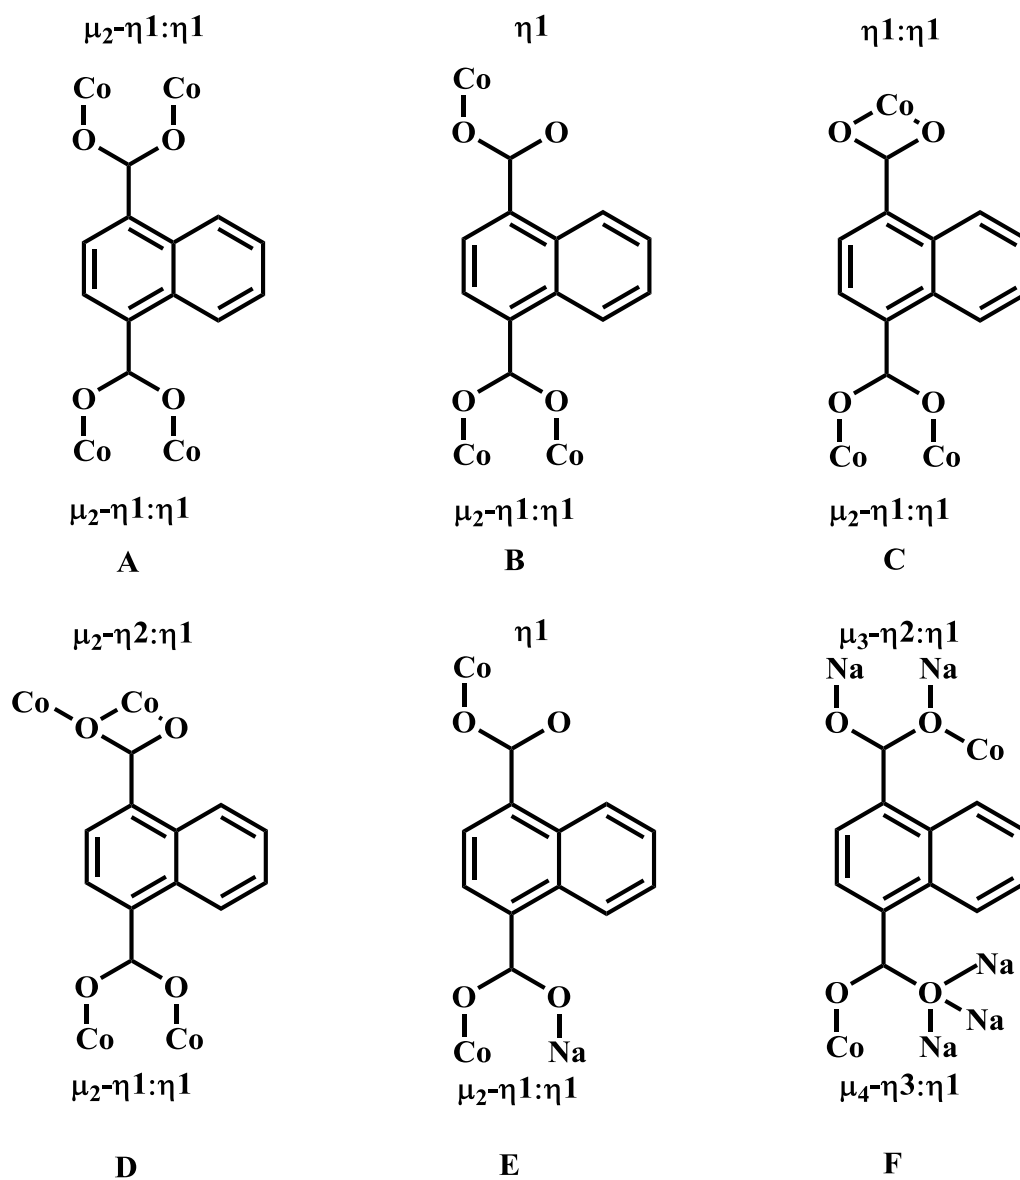

**Scheme S1.** The observed coordination modes of the 1,4-ndc<sup>2-</sup> ligands in 1-4.

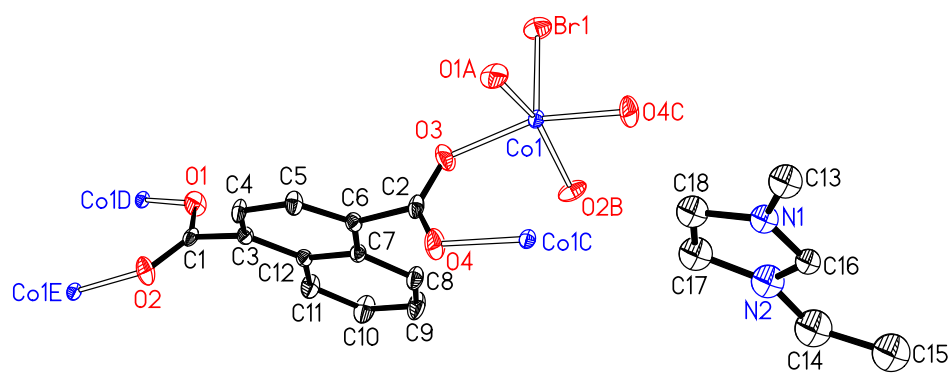

**Figure S1.** ORTEP view of **1** with the atom numbering scheme. The atoms are represented by 30% probability thermal ellipsoids. All the H atoms are omitted for clarity. Symmetry codes: A  $1/2 + x, 1/2 - y, -1/2 + z$ ; B  $3/2 - x, -1/2 + y, 3/2 - z$ ; C  $2 - x, -y, 1 - z$ ; D  $-1/2 + x, 1/2 - y, 1/2 + z$ ; E.  $3/2 - x, 1/2 + y, 3/2 - z$ .

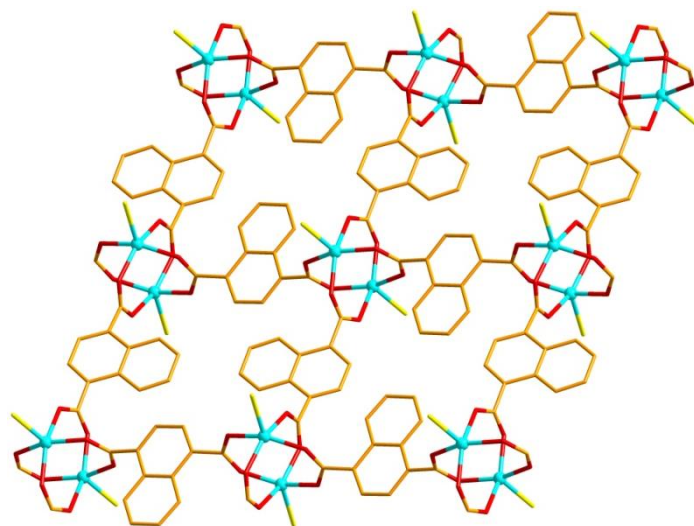

**Figure S2.** A view of the 2D anionic layer in **1** with hydrogen atoms omitted for clearly.

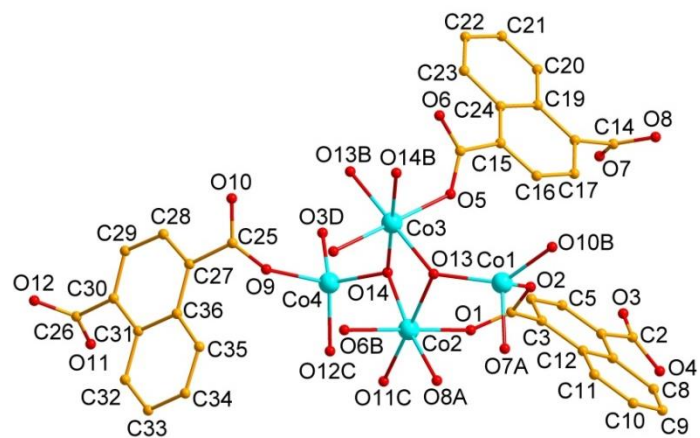

**Figure S3.** (a) The coordination environments for Co atoms in **2** with H atoms and [PMIm]<sup>+</sup> omitted for clarity. Symmetry codes: A  $1/2 + x, 1/2 - y, 1 - z$ ; B  $-x, -y, 1 - z$ ; C  $-x, 1/2 + y, 1/2 - z$ ; D  $-1/2 - x, -1/2 + y, z$ .

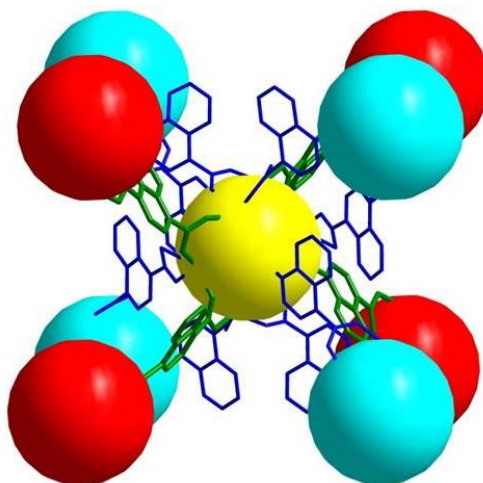

**Figure S4.** Each SBU (yellow ball) connected to eight others (turquoise and red balls) through twelve  $1,4\text{-ndc}^{2-}$  including four “double-bridges” (blue) and four “single-bridge” (green) along multi-direction.

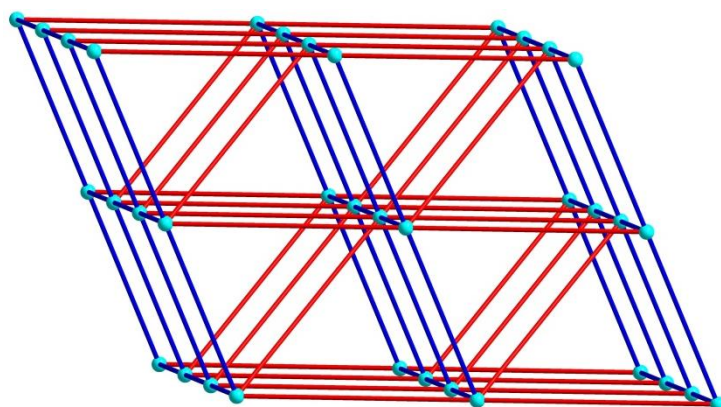

**Figure S5.** The eight-connected topological framework of **2** in which the nodes represent heptanuclear SBUs, the red bonds represent “single-bridge” and the blue bonds represent “doubly-bridges”.



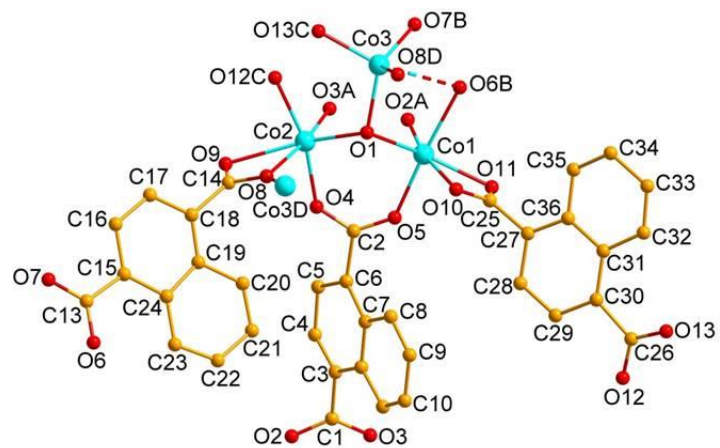

**Figure S6.** (a) The coordination environments of Co(II) ions in **3** with H atoms and [BMIm]<sup>+</sup> omitted for clarity. Symmetry codes: A  $1/2 - x, 1/2 + y, 1/2 - z$ ; B  $-1/2 + x, 1/2 + y, z$ ; C  $1/2 + x, 1/2 + y, z$ ; D  $1/2 - x, 3/2 - y, -z$ .

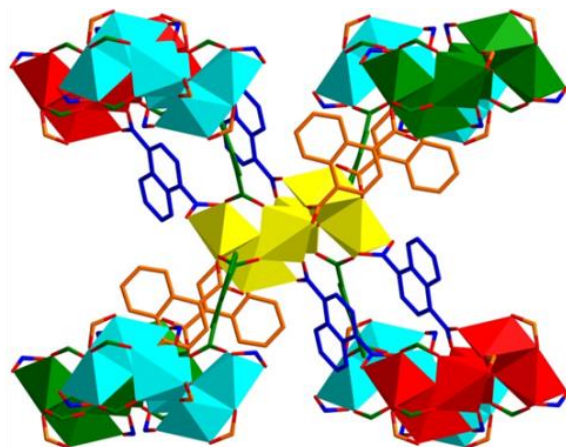

**Figure S7.** The hexanuclear SBU (yellow polyhedron) with eight adjacent SBUs (four turquoise, two green and two orange polyhedrons) by twelve linkages including four “single-bridge” (green) and four “doubly-bridges” (orange and blue).

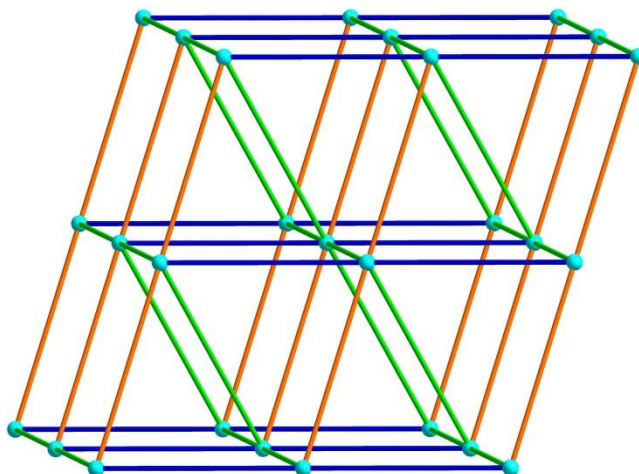

**Figure S8.** The eight-connected topological framework of **3** in which the nodes represent hexanuclear SBUs, the bright green bond represents “single-bridge”, the blue and orange bonds represent two kinds of coordination modes of “doubly-bridges”.

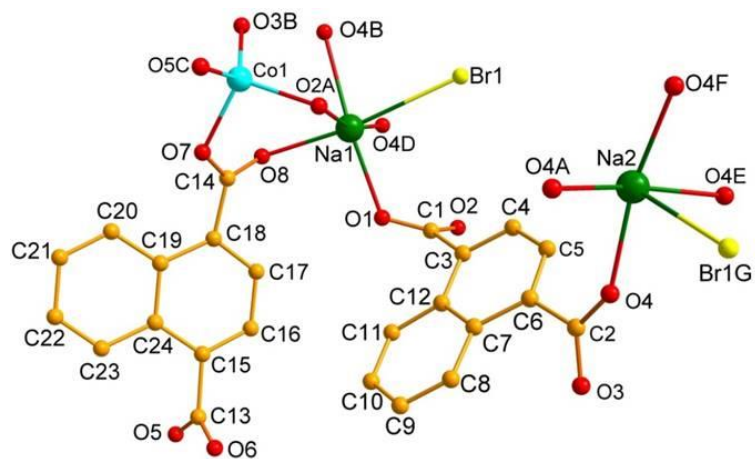

**Figure S9.** The coordination environments of Co(II) and Na(I) ions in **4** with H atoms and [AMIm]<sup>+</sup> omitted for clarity. Symmetry codes: A  $y, 3/2 - x, z$ ; B  $y, 3/2 - x, -1 + z$ ; C  $1 - y, 1/2 + x, -z$ ; D  $x, y, -1 + z$ ; E  $3/2 - y, x, z$ ; F  $3/2 - x, 3/2 - y, z$ ; G  $x, y, 1 + z$ .

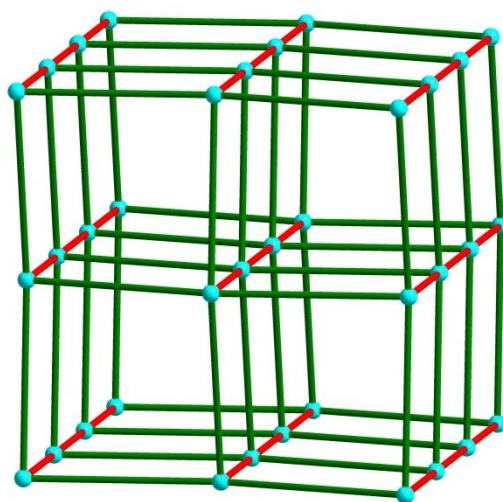

**Figure S10.** The six-connected topological structure of **4** in which the nodes represent heterometal SBUs, the green bonds represent “doubly-bridges” and the red bonds represent “fourfold-bridges”.

#### 4. Additional Measurements.

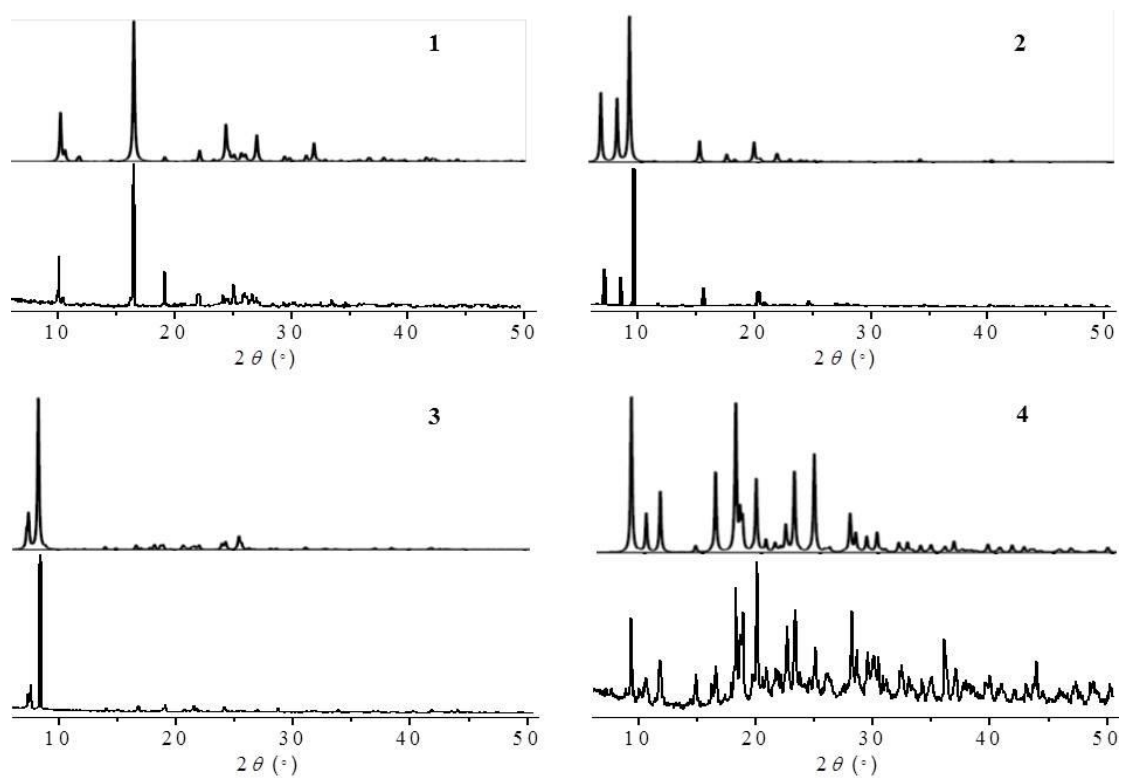

**Figure S11.** The X-ray powder diffraction (XRPD) patterns that of the bulk samples (down) and those calculated from the single-crystal diffraction data (up) for **1-4** at room temperature.

## 5. Additional magnetic properties.

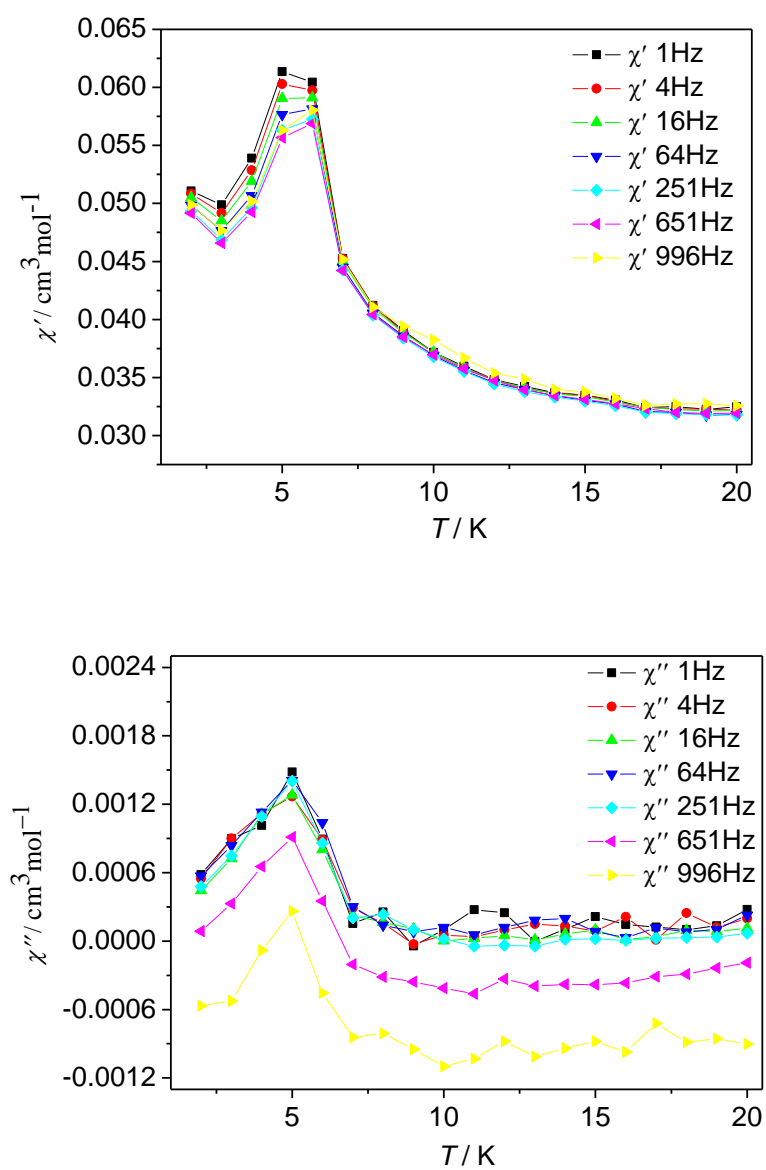

**Figure S12.** Temperature dependence of the real part (up) and the imaginary part (bottom) of the ac susceptibility of **1** in a 3 Oe ac field at different ac frequency with a zero applied dc field.

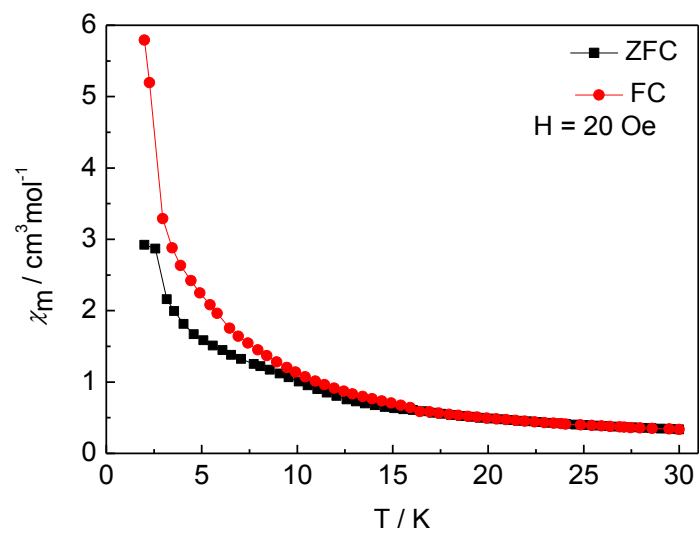

**Figure S13.** Field cooling and zero-field cooling (FC/ZFC) magnetization curves of **4** at 20 Oe.



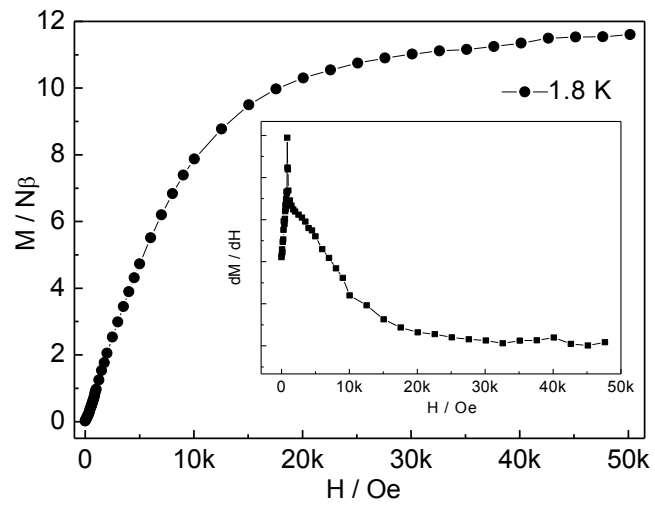

**Figure S14.** Field dependence of isothermal magnetization curve for **4** at 1.8 K. The inset shows the  $\delta M / \delta H$  curve at 1.8 K.

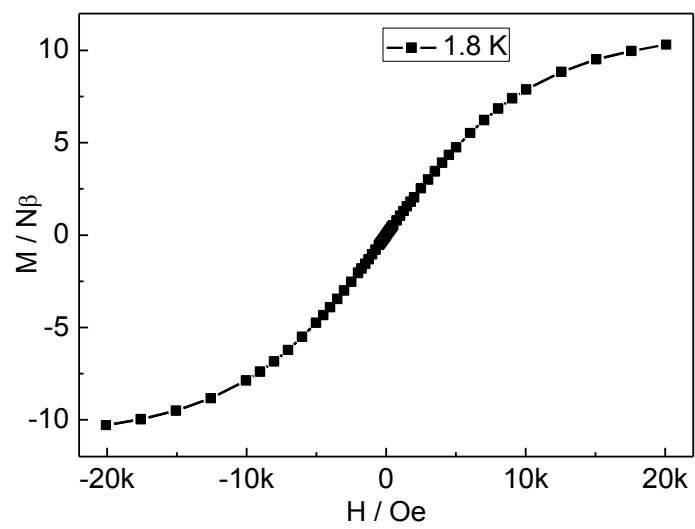

**Figure S15.** The hysteresis loop at 1.8 K for 4.

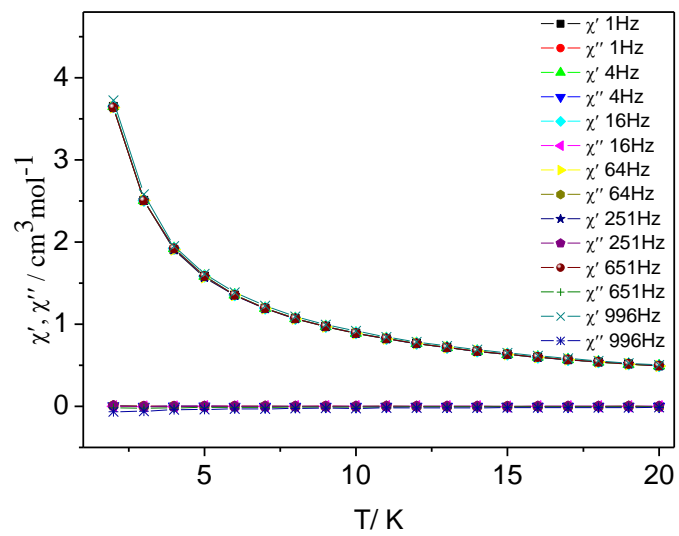

**Figure S16.** Temperature dependence of the real part ( $\chi'$ ) and the imaginary part ( $\chi''$ ) of the ac susceptibility of **4** in a 3 Oe ac field at different ac frequency with a zero applied dc field.
